# Supplementary material for: Improving Healthy Aging by Monitoring Patients’ Lifestyle through a Wearable Device: Results of a Feasibility Study
Source: MDPI journal article supplement (doi:10.3390/ijerph18189806), 2021-09-17
Supplement: s1 [file s1]

Table S4. Questionnaire for professionals.

**Profession:**

**Age:**

**Integrated Group Medicine:**

**Years of experience:**

**Years of experience in IGM:**

| N° item |   |   |   |   |   | Statement                                                                                                                           |
|---------|---|---|---|---|---|-------------------------------------------------------------------------------------------------------------------------------------|
|         |   |   |   |   |   | <b>1 = Strongly Disagree, 2 = Disagree, 3 = Neutral, 4 = Agree, 5 = Disagree</b>                                                    |
| 1-CU    | 1 | 2 | 3 | 4 | 5 | I think that monitoring my patients' activity and health 24 hours a day, 7 days a week, can be a good thing in my clinical practice |
| 2-CO    | 1 | 2 | 3 | 4 | 5 | I feel active in monitoring my patient                                                                                              |
| 3-CU    | 1 | 2 | 3 | 4 | 5 | I think this kind of monitoring can be a support to the activities of MGI                                                           |
| 4-WIEU  | 1 | 2 | 3 | 4 | 5 | The website, where patients' data are stored, is easy to use                                                                        |
| 5-MU    | 1 | 2 | 3 | 4 | 5 | I don't think this kind monitoring requires a lot of times to be done                                                               |
| 6-CU    | 1 | 2 | 3 | 4 | 5 | I think this kind of monitoring is more useful if it is done in a MDI setting rather than GP setting.                               |
| 7-WIEU  | 1 | 2 | 3 | 4 | 5 | I didn't have any difficulties in answering to patients' doubts and questions                                                       |
| 8-CO    | 1 | 2 | 3 | 4 | 5 | I felt that patients were available and collaborative in this type of monitoring                                                    |
| 9-MU    | 1 | 2 | 3 | 4 | 5 | In order to monitoring I think using a non-medical device is easier to accept for patients                                          |
| 10-CU   | 1 | 2 | 3 | 4 | 5 | I think this kind of data are useful for the assistance provided to this type of patient                                            |
| 11-CU   | 1 | 2 | 3 | 4 | 5 | I think the data collected from this type of monitoring is enough for the assistance provided to this type of patient               |
| 12-CU   | 1 | 2 | 3 | 4 | 5 | I think the data collected from this type of monitoring is necessary for the assistance provided to this type of patient            |
| 13-CU   | 1 | 2 | 3 | 4 | 5 | I think that monitoring my patients in this way can help me picking up early signs of any clinical problems / complications         |

|         |                                                                                  |   |   |   |   |                                                                                                                  |
|---------|----------------------------------------------------------------------------------|---|---|---|---|------------------------------------------------------------------------------------------------------------------|
| 14-MU   | 1                                                                                | 2 | 3 | 4 | 5 | I think the data displayed may be a criterion for scheduling visits                                              |
| 15-WIEU | 1                                                                                | 2 | 3 | 4 | 5 | I find correspondence between the recorded data and the experiences reported by the patients                     |
| 18      | What determined the frequency of the visualization of the collected data?        |   |   |   |   | a) clinical picture of the patient<br>b) time available<br>c) a predetermined independent cadence of the patient |
| 19      | How long would it take to visualize the data to be useful for clinical practice? |   |   |   |   |                                                                                                                  |
| 18      | What other types of patients could benefit from this type of monitoring?         |   |   |   |   |                                                                                                                  |

Legend of dimensions: CU, clinical usefulness; MU, management usefulness; WIEU, web interface ease-of-use; COLL, collaboration.
