# Supplementary material for: Improving Healthy Aging by Monitoring Patients’ Lifestyle through a Wearable Device: Results of a Feasibility Study
Source: MDPI journal article supplement (doi:10.3390/ijerph18189806), 2021-09-17
Supplement: s1 [file s1]

Table S2. Description of dimensions related to technology acceptance (professionals).

| <b>Dimensions</b>                | <b>Description</b>                                                                                                                                                    |
|----------------------------------|-----------------------------------------------------------------------------------------------------------------------------------------------------------------------|
| <b>Clinical usefulness</b>       | It investigates the perception of the usefulness of this type of monitoring in the IGM setting                                                                        |
| <b>Management usefulness</b>     | For management usefulness we intend to investigate the utility of use in practical management: time spent and resources.                                              |
| <b>Web interface ease of use</b> | This dimension investigates the ease of viewing and collecting data recorded by the device                                                                            |
| <b>Collaboration</b>             | Collaboration means how much the healthcare professional feels involved in managing this type of monitoring and how much collaboration they perceive from the patient |
